# Supplementary material for: Clinical Utility of the Contrast-Enhanced Endoscopic Ultrasound Guided Fine Needle Aspiration in the Diagnosis of Pancreatic Cyst
Source: MDPI journal article supplement (doi:10.3390/diagnostics12092209), 2022-09-12
Supplement: s1 [file s1]

# Clinical Utility of the Contrast-Enhanced Endoscopic Ultrasound Guided Fine Needle Aspiration in the Diagnosis of Pancreatic Cyst

Miruna Patricia Olar <sup>1</sup>, Sorana D. Bolboacă <sup>2,\*</sup>, Cristina Pojoga <sup>1,3,4</sup>, Ofelia Moșteanu <sup>1,3</sup>, Marcel Gheorghiu <sup>1,3</sup>, Radu Seicean <sup>5</sup>, Ioana Rusu <sup>1,3</sup>, Zeno Sparchez <sup>1,3</sup>, Nadim Al Hajjar <sup>3,6</sup> and Andrada Seicean <sup>1,3</sup>

## Supplementary Materials

Table S1. B-mode EUS aspects according to the final diagnosis.

| Cyst features             | IPM<br>N<br>(n=30) | PK<br>(n=9) | SCN<br>(n=8) | Cystic Ductal<br>adk (n=6) | MCN<br>(n=4) | Cystic acinar cell<br>carcinoma (n=1) | Total<br>(n=58) |
|---------------------------|--------------------|-------------|--------------|----------------------------|--------------|---------------------------------------|-----------------|
| Communication with<br>MPD | 9                  | 2           | 0            | 0                          | 0            | 0                                     | 11              |
| MPD size                  |                    |             |              |                            |              |                                       |                 |
| 5-9 mm                    | 4                  | 0           | 1            | 1                          | 0            | 0                                     | 6               |
| ≥10 mm                    | 2                  | 0           | 0            | 0                          | 0            | 0                                     | 2               |
| Mural nodules             | 7                  | 0           | 0            | 5                          | 0            | 1                                     | 13              |
| Solid mass                | 10                 | 2           | 0            | 6                          | 2            | 1                                     | 21              |
| Septae                    | 20                 | 2           | 8            | 5                          | 3            | 1                                     | 31              |
| Septae>2 mm               | 3                  | 0           | 0            | 3                          | 0            | 1                                     | 7               |

Data are expressed as numbers; IPMN- branch duct intrapapillary mucinous neoplasm, PK- pseudocyst, SCN- serous cystic neoplasms, MCN- mucinous cystic neoplasms, MPD- main pancreatic duct

**Table S2.** Arterial enhancement and venous wash-out on the wall, septa and solid component by type of pancreatic cysts.

| <b>CH-EUS features</b> | <b>SCN<br/>(n=8)</b> | <b>PK<br/>(n=9)</b> | <b>IPMN<br/>(n=30)</b> | <b>MCN<br/>(n=4)</b> | <b>Cystic acinar cell<br/>carcinoma (n=1)</b> | <b>Cystic ductal<br/>adk (n=6)</b> |
|------------------------|----------------------|---------------------|------------------------|----------------------|-----------------------------------------------|------------------------------------|
| <i>Wall</i>            |                      |                     |                        |                      |                                               |                                    |
| Arterial enhancement   |                      |                     |                        |                      |                                               |                                    |
| yes                    | 4                    | 1                   | 30                     | 4                    | 1                                             | 6                                  |
| no                     | 4                    | 8                   | 0                      | 0                    | 0                                             | 0                                  |
| Venous wash-out        |                      |                     |                        |                      |                                               |                                    |
| fast                   | 1                    | 0                   | 13                     | 3                    | 1                                             | 3                                  |
| slow                   | 3                    | 3                   | 17                     | 1                    | 0                                             | 0                                  |
| <i>Septae</i>          |                      |                     |                        |                      |                                               |                                    |
| Arterial enhancement   |                      |                     |                        |                      |                                               |                                    |
| yes                    | 7                    | 0                   | 12                     | 3                    | 1                                             | 3                                  |
| no                     | 0                    | 0                   | 0                      | 0                    | 0                                             | 0                                  |
| Venous wash-out        |                      |                     |                        |                      |                                               |                                    |
| fast                   | 2                    | 0                   | 6                      | 2                    | 1                                             | 1                                  |
| slow                   | 5                    | 0                   | 6                      | 1                    | 0                                             | 2                                  |
| <i>Solid component</i> | 0                    | 2                   | 10                     | 2                    | 1                                             | 6                                  |
| <i>Mural nodule</i>    | 0                    | 0                   | 7                      | 0                    | 1                                             | 5                                  |
| Arterial enhancement   |                      |                     |                        |                      |                                               |                                    |
| hyper                  | 0                    | 0                   | 6                      | 0                    | 1                                             | 3                                  |
| hypo                   | 0                    | 0                   | 0                      | 0                    | 0                                             | 2                                  |
| iso                    | 0                    | 0                   | 1                      | 0                    | 0                                             |                                    |
| Venous wash-out        |                      |                     |                        |                      |                                               |                                    |
| fast                   | 0                    | 0                   | 4                      | 0                    | 1                                             | 3                                  |
| slow                   | 0                    | 0                   | 3                      | 0                    | 0                                             | 2                                  |

Data are expressed as numbers; SCN- serous cystic neoplasms, PK- pseudocyst, IPMN- branch duct intrapapillary mucinous neoplasm, MCN- mucinous cystic neoplasms, adk- adenocarcinoma, MPD- main pancreatic duct

**Table S3.** Contrast-EUS-FNA cytology assessment of specific pancreatic cysts.

| Final diagnosis of cysts assessed<br>With CH- EUS-FNA | SCN<br>(n=7) | PK<br>(n=7) | IPMN<br>(n=23) | MCN<br>(n=4) | Cystic acinar cell<br>carcinoma<br>(n=1) | Cystic<br>ductal adk<br>(n=6) |
|-------------------------------------------------------|--------------|-------------|----------------|--------------|------------------------------------------|-------------------------------|
| <b>Fluid + mural nodules cytology (n=48)</b>          |              |             |                |              |                                          |                               |
| Conclusive/inconclusive (n=41/7)                      | 7/0          | 7/0         | 19/4           | 2/2          | 1/0                                      | 5/1                           |
| Malignant/non-malignant (16/25)                       | 0/7          | 0/7         | 9/9            | 2/2          | 1/0                                      | 5/0                           |
| High dysplasia / carcinoma                            | -            | -           | 9/19           | 1/2          | 1/0                                      | 0/5                           |
| Low / moderate dysplasia                              | -            | -           | 4/19           | 1/2          | -                                        | -                             |
| No dysplasia                                          | 0/7          | 0/7         | 6/19           | -            | -                                        | -                             |
| <b>Mural nodule cytology (n=13)</b>                   |              |             |                |              |                                          |                               |
| Conclusive/inconclusive (13/0)                        | 0/0          | 0/0         | 7/0            | 0/0          | 1/0                                      | 5/0                           |
| Malignant/non-malignant (10/3)                        | 0/0          | 0/0         | 4/3            | 0/0          | 1/0                                      | 5/0                           |
| High dysplasia / carcinoma (n=10)                     | -            | -           | 4              | -            | 1                                        | 5                             |
| Low / moderate dysplasia (n=3)                        | -            | -           | 3              | 0            | -                                        | 0                             |

SCN- serous cystic neoplasms, PK- pseudocyst, IPMN- branch duct intrapapillary mucinous neoplasm, MCN- mucinous cystic neoplasms, adk- adenocarcinoma
